# Supplementary material for: Association of BRCA1/2defects with genomic scores predictive of DNA damage repair deficiency among breast cancer subtypes
Source: Springer Nature journal article supplement (doi:10.1186/s13058-014-0475-x), 2014-12-04

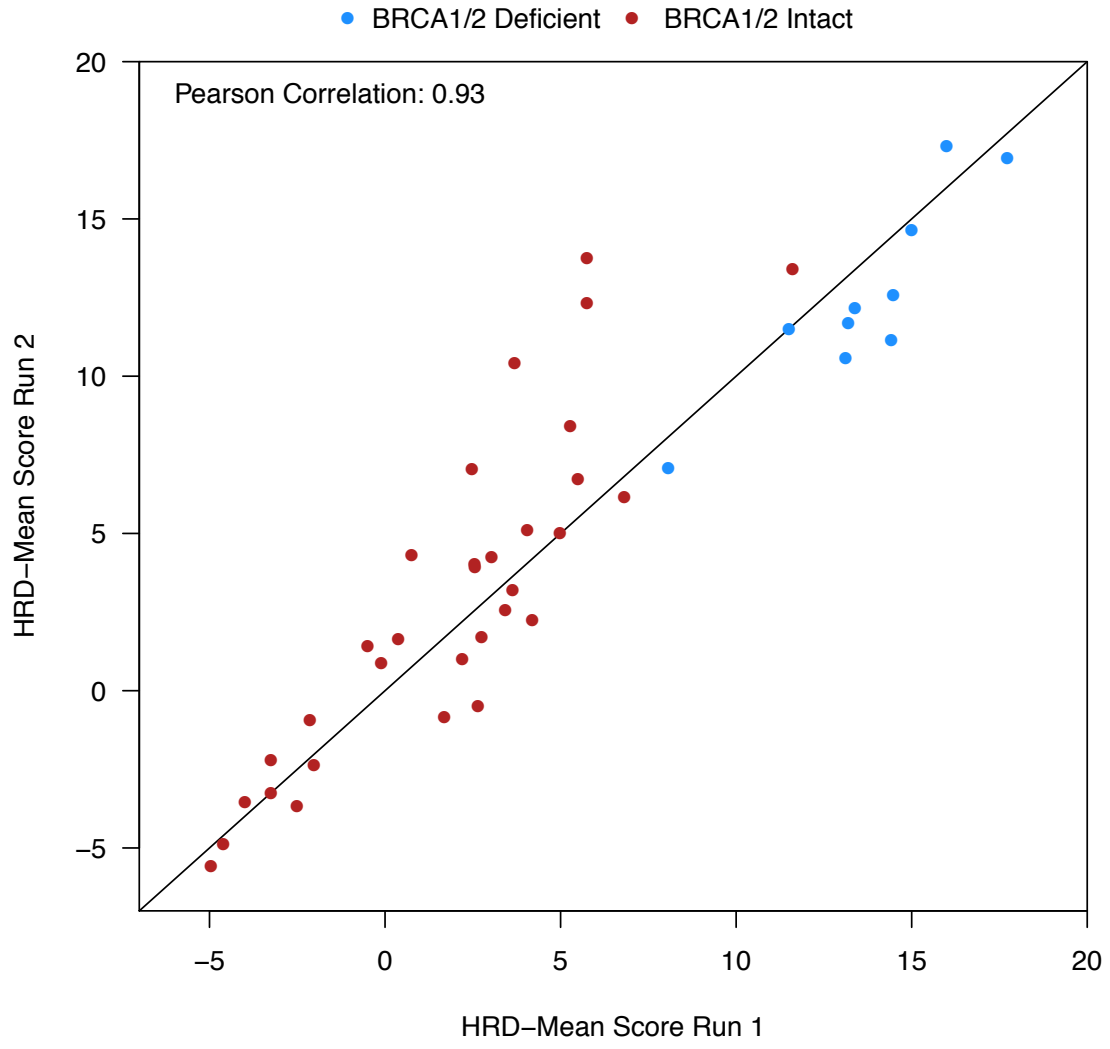

Supplement: MOESM3 [file 9781244]
